# Supplementary material for: Paecilomyces variotii: A Fungus Capable of Removing Ammonia Nitrogen and Inhibiting Ammonia Emission from Manure
Source: PLoS One. 2016 Jun 27;11(6):e0158089. doi: 10.1371/journal.pone.0158089 (PMC4922629; doi:10.1371/journal.pone.0158089)
Supplement: S3 Table — (XLSX) [file pone.0158089.s003.xlsx]

## Sheet: CN
Initial NH4+-N Con.
	ABS	Initial Con.
	0.284	52.889
	0.284	52.889
	0.272	50.7523
	0.265	49.5059
	0.261	48.7937
	0.267	49.862
	0.298	55.3819
	0.28	52.1768
Mean value	0.276375	51.5313
12h
C/N	ABS	NH4+-N Con.	Removal efficiency	Removal efficiency %
5	0.291	26.1947	0.491674	49.1674
5	0.3	26.969	0.476649	47.6649
5	0.27	24.3881	0.526733	52.6733
10	0.171	15.8711	0.69201	69.201
10	0.192	17.6778	0.656951	65.6951
10	0.169	15.6991	0.695349	69.5349
20	0.213	19.4844	0.621892	62.1892
20	0.21	19.2263	0.626901	62.6901
20	0.184	16.9895	0.670307	67.0307
40	0.205	18.7961	0.635248	63.5248
40	0.198	18.1939	0.646934	64.6934
40	0.197	18.1079	0.648604	64.8604
24h
C/N	ABS	NH4+-N Con.	Removal efficiency	Removal efficiency %
5	0.253	22.9256	0.555114	55.5114
5	0.25	22.6675	0.560122	56.0122
5	0.248	22.4954	0.563461	56.3461
10	0.026	3.39678	0.934083	93.4083
10	0.029	3.65487	0.929075	92.9075
10	0.028	3.56884	0.930744	93.0744
20	0.022	3.05266	0.940761	94.0761
20	0.021	2.96663	0.942431	94.2431
20	0.021	2.96663	0.942431	94.2431
40	0	0	1	100
40	0	0	1	100
40	0.01	0	0.999806	99.9806
